# Supplementary material
Source: publisher site journal article supplement (https://www.spandidos-publications.com/1634/downloadSupplementary)
Supplement: Supplementary file 1 [file downloadSupplementary]

Video S1. Spraying porcine FS on the ESD wound of the esophagus. The esophagus ESD wound was examined after the lesion was completely dissected. Microvessels <0.3 mm were preserved. There was no perforation or damage to the muscle layer. The porcine FS was sprayed on the wound through a spray tube. A gel formed several seconds after mixing of the two components of porcine FS consisting of fibrinogen gel, lyophilized thrombin and catalyst solution of CaCl<sub>2</sub>. ESD, endoscopic submucosal dissection; FS, fibrin sealant.

Table SI. Preservation of fibrin sealant 24 h after endoscopic submucosal dissection.

| Preservation         | 0       | ≤50%      | >50%    | P-value <sup>a</sup> |
|----------------------|---------|-----------|---------|----------------------|
| Location             |         |           |         | 1.000                |
| Lower                | 1 (5.6) | 16 (88.9) | 1 (5.6) |                      |
| Middle               | 2 (3.9) | 47 (92.2) | 2 (3.9) |                      |
| Upper                | 0 (0)   | 5 (100)   | 0 (0)   |                      |
| Resection range      |         |           |         | 1.000                |
| <3/4 circumferential | 3 (5.5) | 49 (89.1) | 3 (5.5) |                      |
| ≥3/4 circumferential | 0 (0)   | 19 (100)  | 0 (0)   |                      |

<sup>a</sup>Kruskal-Wallis H-test. Values are expressed as n (%). Lower, lower third of esophagus; Middle, middle third of esophagus; Upper, upper third of esophagus.

Table SII. Univariate regression analysis for good 1-month healing rate in all patients (n=150) and in subgroups.

| Variable                              | Population                                                  | OR     | 95% CI       | P-value |
|---------------------------------------|-------------------------------------------------------------|--------|--------------|---------|
| Use of FS                             | Total population (n=150)                                    | 3.018  | 1.492-6.103  | <0.05   |
| Resection range<br><3/4 circumference | Total population (n=150)                                    | 9.953  | 3.688-26.858 | <0.05   |
| Use of FS                             | Subgroup with resection range<br><3/4 circumference (n=123) | 12.889 | 3.659-45.398 | <0.05   |
| Use of FS                             | Subgroup with resection range<br>≥3/4 circumference (n=27)  | 2.450  | 0.243-25.717 | 0.441   |

OR, odds ratio; CI, confidence interval; FS, fibrin sealant.

Table SIII. Univariate regression analysis for stricture in all patients (n=150).

| Variables                             | OR             | 95% CI       | P-value |
|---------------------------------------|----------------|--------------|---------|
| Use of FS                             | 3.265          | 0.637-16.726 | >0.05   |
| Resection range<br>≥3/4 circumference | 1 <sup>a</sup> | -            | -       |

<sup>a</sup>Resection range ≥3/4 circumference predicts stricture perfectly, since patients who developed stricture all presented with a larger resection range (≥3/4 circumference).

Table SIV. Multivariate regression analysis for stricture in all patients (n=150).

| Variable                  | OR     | 95% CI        | P-value |
|---------------------------|--------|---------------|---------|
| Use of FS                 | 2.003  | 0.337-11.894  | 0.445   |
| Age, continuous           | 0.998  | 0.886-1.124   | 0.975   |
| Location                  |        |               | 0.130   |
| Middle vs. lower          | 1.652  | 0.163-16.743  | 0.671   |
| Upper vs. lower           | 11.981 | 0.739-194.183 | 0.081   |
| Circumferential resection | 13.707 | 2.504-75.024  | 0.003   |

OR, odds ratio; FS, fibrin sealant; Lower, lower third of esophagus; Middle, middle third of esophagus; Upper, upper third of esophagus.

Table SV. Stricture rates for different 1-month ulcer healing grades ( $\geq 3/4$  circumferences, n=27).

| Healing grade | Stricture (n=8) | No stricture (n=19) | P-value <sup>a</sup> |
|---------------|-----------------|---------------------|----------------------|
| Poor          | 5 (62.5)        | 9 (47.4)            | 0.954                |
| Moderate      | 0 (0)           | 7 (36.8)            |                      |
| Good          | 3 (37.5)        | 3 (15.8)            |                      |

<sup>a</sup>Mann-Whitney U rank-sum test, comparing the difference of distribution of one-month healing outcome in stricture and non-stricture groups. Values are expressed as n (%).
